# Supplementary material for: Disparities in the Prevalence and Risk Factors for Carotid and Lower Extremities Atherosclerosis in a General Population—Bialystok PLUS Study
Source: MDPI journal article supplement (doi:10.3390/jcm12072627), 2023-03-31
Supplement: s1 [file s1]

Table S1. Characteristics of hypertensive subjects in the study population by APCA and ABI  $\leq$  0.9 - medications used.

|                                | Patients without<br>APCA (n=120) | Patients with<br>APCA (n=235) | P value | Patients with<br>ABI > 0.9 (n=282) | Patients with<br>ABI $\leq$ 0.9 (n=31) | P value |
|--------------------------------|----------------------------------|-------------------------------|---------|------------------------------------|----------------------------------------|---------|
| Beta-blockers                  | 29 (42%)                         | 114 (58.2%)                   | 0.025   | 107 (52.2%)                        | 18 (69.2%)                             | 0.143   |
| Calcium channel blockers       | 6 (8.7%)                         | 45 (23%)                      | 0.012   | 42 (20.5%)                         | 6 (23.1%)                              | 0.798   |
| ACE- inhibitors and<br>sartans | 38 (55.1%)                       | 120 (61.2%)                   | 0.394   | 124 (60.5%)                        | 11 (42.3%)                             | 0.092   |
| Diuretics                      | 11 (15.9%)                       | 39 (19.9%)                    | 0.592   | 35 (17.1%)                         | 7 (26.9%)                              | 0.277   |
